# Supplementary material for: Polymorphism of CBr2Cl2
Source: Royal Society of Chemistry journal article supplement (doi:10.1039/b708757h), 2007-10-05
Supplement: b708757h1.pdf [file b708757h1.pdf]

# Reflex Summary Report for Rietveld Refinement of $\text{CCl}_2\text{Br}_2$ (90K)

|                                                   |        |                        |       |
|---------------------------------------------------|--------|------------------------|-------|
| Final $R_{\text{wp}}$ :                           | 9.16%  | Final $R_{\text{p}}$ : | 6.68% |
| Final $R_{\text{wp}}$<br>(without<br>background): | 36.73% | Final CMACS:           | 0.59% |

## Setup

|                               |             |                         |       |
|-------------------------------|-------------|-------------------------|-------|
| $2\theta$ Range<br>(degrees): | 13.00-80.00 | Step Size<br>(degrees): | 0.029 |
| Experiment:                   | A1-90.xcd   |                         |       |
| Excluded<br>Regions:          | -           |                         |       |

## Radiation

|                      |          |                |        |
|----------------------|----------|----------------|--------|
| Type:                | X-ray    | Source:        | Copper |
| $\lambda$ (Å):       | 1.540562 | Monochromator: | Single |
| dhkl:                | 3.343    | Angle:         | 13.320 |
| Anom.<br>Dispersion: | No       | Polarization:  | 0.500  |

## Lattice Parameters

Lattice Type: Monoclinic      Space Group: C 1 2/C 1

| Parameter | Value                   | Refined? |
|-----------|-------------------------|----------|
| a         | $20.57424 \pm 0.00137$  | Yes      |
| b         | $11.54684 \pm 0.00078$  | Yes      |
| c         | $20.13418 \pm 0.00120$  | Yes      |
| $\alpha$  | 90                      | No       |
| $\beta$   | $111.68499 \pm 0.00369$ | Yes      |
| $\gamma$  | 90                      | No       |

## Structure Parameters

|                           |    |                   |   |
|---------------------------|----|-------------------|---|
| Refined Motion<br>Groups: | 4  | Refined Torsions: | 0 |
| Number of                 | 24 |                   |   |

Refined DOF:

### Fractional Coordinates

| No. | Name | u                 | v                 | w                 | Refined? |
|-----|------|-------------------|-------------------|-------------------|----------|
| 1   | C2   | 0.09357 ± 0.00101 | 0.96852 ± 0.00279 | 0.87329 ± 0.00098 | Yes      |
| 2   | CL21 | 0.02100 ± 0.00107 | 1.03210 ± 0.00296 | 0.88673 ± 0.00145 | Yes      |
| 3   | BR21 | 0.01417 ± 0.00107 | 1.03809 ± 0.00301 | 0.88800 ± 0.00152 | Yes      |
| 4   | CL22 | 0.07763 ± 0.00159 | 0.81885 ± 0.00267 | 0.85514 ± 0.00190 | Yes      |
| 5   | BR22 | 0.07612 ± 0.00166 | 0.80474 ± 0.00266 | 0.85342 ± 0.00202 | Yes      |
| 6   | CL23 | 0.16958 ± 0.00135 | 0.98663 ± 0.00413 | 0.95126 ± 0.00122 | Yes      |
| 7   | BR23 | 0.17675 ± 0.00139 | 0.98833 ± 0.00429 | 0.95862 ± 0.00127 | Yes      |
| 8   | CL24 | 0.10608 ± 0.00156 | 1.03655 ± 0.00298 | 0.80002 ± 0.00134 | Yes      |
| 9   | BR24 | 0.10726 ± 0.00168 | 1.04296 ± 0.00306 | 0.79311 ± 0.00141 | Yes      |
| 10  | C3   | 0.12471 ± 0.00123 | 0.68998 ± 0.00213 | 0.61973 ± 0.00116 | Yes      |
| 11  | CL31 | 0.13579 ± 0.00123 | 0.77623 ± 0.00219 | 0.69593 ± 0.00116 | Yes      |
| 12  | BR31 | 0.13682 ± 0.00123 | 0.78437 ± 0.00219 | 0.70311 ± 0.00116 | Yes      |
| 13  | CL32 | 0.05158 ± 0.00150 | 0.59757 ± 0.00266 | 0.60281 ± 0.00156 | Yes      |
| 14  | BR32 | 0.04469 ± 0.00155 | 0.58885 ± 0.00276 | 0.60121 ± 0.00162 | Yes      |
| 15  | CL33 | 0.20079 ± 0.00135 | 0.60531 ± 0.00285 | 0.63541 ± 0.00120 | Yes      |
| 16  | BR33 | 0.20795 ± 0.00138 | 0.59733 ± 0.00296 | 0.63689 ± 0.00121 | Yes      |
| 17  | CL34 | 0.11070 ± 0.00191 | 0.78081 ± 0.00210 | 0.54476 ± 0.00116 | Yes      |
| 18  | BR34 | 0.10938 ± 0.00201 | 0.78937 ± 0.00210 | 0.53769 ± 0.00116 | Yes      |
| 19  | C4   | 0.11911 ± 0.00110 | 0.43484 ± 0.00211 | 0.87780 ± 0.00110 | Yes      |
| 20  | CL41 | 0.19490 ± 0.00116 | 0.34847 ± 0.00204 | 0.89577 ± 0.00137 | Yes      |
| 21  | BR41 | 0.20204 ± 0.00116 | 0.34033 ± 0.00205 | 0.89746 ± 0.00142 | Yes      |
| 22  | CL42 | 0.04506 ± 0.00124 | 0.34405 ± 0.00248 | 0.85933 ± 0.00129 | Yes      |
| 23  | BR42 | 0.03809 ± 0.00126 | 0.33549 ± 0.00252 | 0.85759 ± 0.00136 | Yes      |
| 24  | CL43 | 0.12886 ± 0.00127 | 0.52230 ± 0.00306 | 0.95319 ± 0.00143 | Yes      |
| 25  | BR43 | 0.12978 ± 0.00130 | 0.53054 ± 0.00318 | 0.96030 ± 0.00147 | Yes      |
| 26  | CL44 | 0.10763 ± 0.00148 | 0.52454 ± 0.00215 | 0.80289 ± 0.00152 | Yes      |
| 27  | BR44 | 0.10655 ± 0.00155 | 0.53299 ± 0.00221 | 0.79583 ± 0.00157 | Yes      |
| 28  | C1   | 0.84160 ± 0.00107 | 0.21439 ± 0.00263 | 0.87941 ± 0.00087 | Yes      |
| 29  | CL11 | 0.82844 ± 0.00136 | 0.06526 ± 0.00265 | 0.85788 ± 0.00089 | Yes      |
| 30  | BR11 | 0.82720 ± 0.00143 | 0.05120 ± 0.00265 | 0.85585 ± 0.00089 | Yes      |
| 31  | CL12 | 0.91798 ± 0.00170 | 0.23209 ± 0.00270 | 0.95705 ± 0.00122 | Yes      |
| 32  | BR12 | 0.92518 ± 0.00177 | 0.23375 ± 0.00272 | 0.96437 ± 0.00128 | Yes      |
| 33  | CL13 | 0.85149 ± 0.00124 | 0.29027 ± 0.00271 | 0.80723 ± 0.00107 | Yes      |
| 34  | BR13 | 0.85242 ± 0.00131 | 0.29742 ± 0.00274 | 0.80043 ± 0.00110 | Yes      |
| 35  | CL14 | 0.76846 ± 0.00174 | 0.26996 ± 0.00339 | 0.89548 ± 0.00172 | Yes      |

|    |      |                       |                       |                       |     |
|----|------|-----------------------|-----------------------|-----------------------|-----|
| 36 | BR14 | $0.76157 \pm 0.00182$ | $0.27520 \pm 0.00351$ | $0.89700 \pm 0.00184$ | Yes |
|----|------|-----------------------|-----------------------|-----------------------|-----|

## Occupancies

| No. | Name | Occupancy | Refined? |
|-----|------|-----------|----------|
| 1   | C2   | 1.00000   | No       |
| 2   | CL21 | 0.50000   | No       |
| 3   | BR21 | 0.50000   | No       |
| 4   | CL22 | 0.50000   | No       |
| 5   | BR22 | 0.50000   | No       |
| 6   | CL23 | 0.50000   | No       |
| 7   | BR23 | 0.50000   | No       |
| 8   | CL24 | 0.50000   | No       |
| 9   | BR24 | 0.50000   | No       |
| 10  | C3   | 1.00000   | No       |
| 11  | CL31 | 0.50000   | No       |
| 12  | BR31 | 0.50000   | No       |
| 13  | CL32 | 0.50000   | No       |
| 14  | BR32 | 0.50000   | No       |
| 15  | CL33 | 0.50000   | No       |
| 16  | BR33 | 0.50000   | No       |
| 17  | CL34 | 0.50000   | No       |
| 18  | BR34 | 0.50000   | No       |
| 19  | C4   | 1.00000   | No       |
| 20  | CL41 | 0.50000   | No       |
| 21  | BR41 | 0.50000   | No       |
| 22  | CL42 | 0.50000   | No       |
| 23  | BR42 | 0.50000   | No       |
| 24  | CL43 | 0.50000   | No       |
| 25  | BR43 | 0.50000   | No       |
| 26  | CL44 | 0.50000   | No       |
| 27  | BR44 | 0.50000   | No       |
| 28  | C1   | 1.00000   | No       |
| 29  | CL11 | 0.50000   | No       |
| 30  | BR11 | 0.50000   | No       |
| 31  | CL12 | 0.50000   | No       |
| 32  | BR12 | 0.50000   | No       |
| 33  | CL13 | 0.50000   | No       |
| 34  | BR13 | 0.50000   | No       |
| 35  | CL14 | 0.50000   | No       |

|    |      |         |    |
|----|------|---------|----|
| 36 | BR14 | 0.50000 | No |
|----|------|---------|----|

---

## Pattern Parameters

Profile Function: Pseudo-Voigt

### FWHM

| Parameter | Value                 | Refined? |
|-----------|-----------------------|----------|
| U         | $0.01375 \pm 0.01272$ | Yes      |
| V         | $0.01521 \pm 0.00843$ | Yes      |
| W         | $0.00376 \pm 0.00128$ | Yes      |

### Profile

| Parameter | Value                 | Refined? |
|-----------|-----------------------|----------|
| NA        | $0.38537 \pm 0.03433$ | Yes      |
| NB        | 0.00000               | No       |

### Line Shift

Instrument  
Geometry: Debye-Scherrer

| Parameter  | Value                  | Refined? |
|------------|------------------------|----------|
| Zero Point | $-0.00433 \pm 0.00148$ | Yes      |
| Shift #1   | 0.00000                | No       |
| Shift #2   | 0.00000                | No       |

---

## Sample Parameters

### Preferred Orientation

Function: Rietveld-Toraya

| Parameter      | Value                  | Refined? |
|----------------|------------------------|----------|
| a <sup>*</sup> | $0.15313 \pm 0.01460$  | Yes      |
| b <sup>*</sup> | $-0.00000 \pm 0.01108$ | Yes      |
| c <sup>*</sup> | $0.98821 \pm 0.00226$  | Yes      |
| G1             | $-8.60954 \pm 0.52184$ | Yes      |
| G2             | $0.23395 \pm 0.00706$  | Yes      |

### Global Isotropic Temperature Factors

| <b>Parameter</b> | <b>Value</b>          | <b>Refined?</b> |
|------------------|-----------------------|-----------------|
| U                | $0.01582 \pm 0.00156$ | Yes             |
